# Supplementary material for: Mechanical properties of normal and binormal double nanohelices
Source: Royal Society of Chemistry journal article supplement (doi:10.1039/c4ra11373j), 2014-12-01
Supplement: c4ra11373j1.pdf [file c4ra11373j1.pdf]

Electronic Supplementary Information (ESI)

**Mechanical properties of normal and binormal double nanohelices**

*Lu Dai<sup>1,\*</sup>, Xiaojiang Huang<sup>2</sup>, Lin Zhang<sup>3</sup>, Li Zhang<sup>3,4\*</sup> and Lijuan Ge<sup>1</sup>*

<sup>1</sup>School of Mathematics and Physics, Suzhou University of Science and Technology,

Suzhou 215009, China

<sup>2</sup>College of Science, Donghua University,

Shanghai 201620, China

<sup>3</sup>Department of Mechanical and Automation Engineering, The Chinese University of Hong Kong, Shatin

N.T., Hong Kong SAR, China

<sup>4</sup>Shenzhen Research Institute, The Chinese University of Hong Kong, Shenzhen, China

---

\* To whom correspondence should be addressed. E-mail: [dailu.1106@aliyun.com](mailto:dailu.1106@aliyun.com) (L. Dai) & [lizhang@mae.cuhk.edu.hk](mailto:lizhang@mae.cuhk.edu.hk) (L. Zhang)

## I. The mathematical expression of the double helix

According to the Cosserat curve model (see ref. 33), the mathematical expression of the double helix  $H_{DI}$  is

$$\begin{aligned} \mathbf{x} = & \left[ \left( \frac{\mathbf{F}'}{\mathbf{E}_1} \sin \theta + \frac{f}{\hat{\psi}} \frac{1}{\mathbf{E}_1} \cos \theta \right) (-\cos \theta) + \left( \frac{\mathbf{F}'}{\mathbf{E}_3} \cos \theta - \frac{f}{\hat{\psi}} \frac{1}{\mathbf{E}_3} \sin \theta + 1 \right) \sin \theta \right] \cos \psi \mathbf{e}_1 \\ & + \left[ \left( \frac{\mathbf{F}'}{\mathbf{E}_1} \sin \theta + \frac{f}{\hat{\psi}} \frac{1}{\mathbf{E}_1} \cos \theta \right) (-\cos \theta) + \left( \frac{\mathbf{F}'}{\mathbf{E}_3} \cos \theta - \frac{f}{\hat{\psi}} \frac{1}{\mathbf{E}_3} \sin \theta + 1 \right) \sin \theta \right] \sin \psi \mathbf{e}_2, \quad (\text{S1}) \\ & + \left[ \left( \frac{\mathbf{F}'}{\mathbf{E}_1} \sin \theta + \frac{f}{\hat{\psi}} \frac{1}{\mathbf{E}_1} \cos \theta \right) \sin \theta + \left( \frac{\mathbf{F}'}{\mathbf{E}_3} \cos \theta - \frac{f}{\hat{\psi}} \frac{1}{\mathbf{E}_3} \sin \theta + 1 \right) \cos \theta \right] \mathbf{e}_3 \end{aligned}$$

where  $\mathbf{e}_i$  ( $i=1,2,3$ ) are the orthogonal basis of the fixed rectangular Cartesian system.

## II. Interlocking helix angle

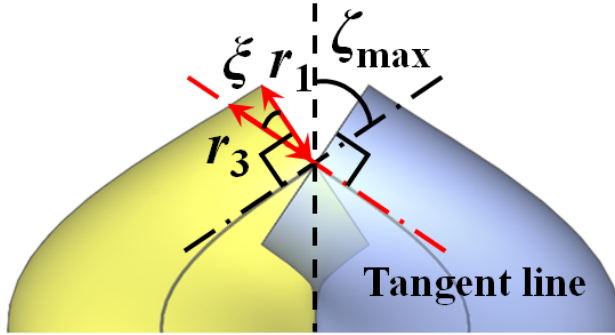

Figure S1. A section of a tightly packed normal double helix.

For the normal and binormal twisted double nanohelices with elliptic cross sections,  $\zeta_{\max}$  is determined by the semiminor axis of  $r_1$  and semimajor axis of  $r_2$ . Fig. 2(a) shows a section of tightly packed normal double helix. The black line is the centre line of the rod and  $T$  is a contacting point on the helix axis. We have

$$\rho = \rho_T + r_2, \quad (\text{S2})$$

where  $\rho$  is the curvature radius of the rod centre line, *i.e.* the curvature radius of the double helix, and  $\rho_T$  is the curvature radius along the tangent line direction of the blue rod centre line at the contacting point  $T$ . The schematics on the left panel in Fig. 2(b) displays a tightly packed normal double helix with the number of turns  $1/4$ . The black and red dash-dotted lines are along the tangent line direction of the yellow and blue rod centre line at the points of the corresponding contacting point  $T$ , respectively. The schematics on the right panel in Fig. 2(b) presents the elliptic cross section of the yellow rod with semi-axes  $r_2$ ,  $r_3$  along the tangent line direction of the blue rod centre line, *i.e.* the red dash-dotted line.

As displayed in Figure S1, we mark the angle of  $\xi$  in Fig. 2(b) to explain the semi-axis  $r_3$  in detail. The relationship of

$$r_3 = \frac{r_1}{\cos \xi} \quad (\text{S3})$$

can be obtained. Since  $\xi = 2\zeta_{\max} - \pi/2$ , we have

$$r_3 = \frac{r_1}{\cos(2\zeta_{\max} - \pi/2)}. \quad (\text{S4})$$

When a normal double nanohelix is tightly packed,  $\rho_T$  is equal to the curvature radius of the yellow elliptic cross section of the rod at the contacting point  $T$ , shown in Supplementary-Figure1, which leads to

$$\rho_T = \frac{r_3^2}{r_2}. \quad (\text{S5})$$

Combining Eqs. (S2), (S4) and (S5) with the curvature radius of the double helix

$\rho = \frac{4\pi^2 r_2^2 + b_0^2}{4\pi^2 r_2}$ , we can obtain

$$b_0 = \frac{2\pi r_1}{\cos(2\zeta_{\max} - \pi/2)}. \quad (\text{S6})$$

Substituting Eq. (S6) in the relationship of  $\tan \zeta_{\max} = \frac{2\pi r_2}{b_0}$ , we have

$$\zeta_{\max} = \arccos \sqrt{\frac{r_1}{2r_2}} \quad (\text{S7})$$

for a normal double helix. Similarly,

$$\zeta_{\max} = \arccos \sqrt{\frac{r_2}{2r_1}} \quad (\text{S8})$$

for a binormal double helix can be derived.
